# Supplementary material for: Integrating Point Sources to Map Anthropogenic Atmospheric Mercury Emissions in China, 1978–2021
Source: Copernicus journal article supplement (doi:10.5194/essd-2024-252), 2024-07-26
Supplement: Supplementary file [file essd-2024-252-supplement.pdf]

1 *Supporting Information for:*

2 **Integrating Point Sources to Map Anthropogenic Atmospheric Mercury Emissions in China, 1978–**  
3 **2021**

4 Yuying Cui<sup>1,2</sup>, Qingru Wu<sup>1,2\*</sup>, Shuxiao Wang<sup>1,2</sup>, Kaiyun Liu<sup>3</sup>, Shengyue Li<sup>1,2</sup>, Zhezhe Shi<sup>1,2</sup>, Daiwei  
5 Ouyang<sup>1,2</sup>, Zhongyan Li<sup>4</sup>, Qinqin Chen<sup>1,2</sup>, Changwei Lü<sup>5,6</sup>, Fei Xie<sup>5,6</sup>, Yi Tang<sup>7</sup>, Yan Wang<sup>8</sup>, Jiming  
6 Hao<sup>1,2</sup>

7 <sup>1</sup>State Key Joint Laboratory of Environment Simulation and Pollution Control, School of Environment, Tsinghua University,  
8 Beijing 100084, China

9 <sup>2</sup>State Environmental Protection Key Laboratory of Sources and Control of Air Pollution Complex, Beijing 100084, China

10 <sup>3</sup>College of Environmental Science and Engineering, North China Electric Power University, Beijing, 102206, PR China

11 <sup>4</sup>Weiyang College, Tsinghua University, Beijing 100084, China

12 <sup>5</sup>School of Ecology and Environment, Inner Mongolia University, 010021, Hohhot, China

13 <sup>6</sup>Institute of Environmental Geology, Inner Mongolia University, 010021, Hohhot, China

14 <sup>7</sup>State Key Laboratory of Environmental Criteria and Risk Assessment, Chinese Research Academy of Environmental Sciences,  
15 100012, Beijing, China

16 <sup>8</sup>College of Electromechanical Engineering, Qingdao University of Science and Technology, Qingdao 266061, China

17

18 *Correspondence to:* Qingru Wu (qrwu@tsinghua.edu.cn)

19 15 Pages (including cover page)

20 2 Texts (S1-S2)

21 4 Tables (S1-S4)

22 5 Figures (S1-S5)

23 **Text S1 Equations for P-CAME emission inventory**

24 Equation S1: Emissions calculation for Tier 1

$$25 \quad E_{i,k,t} = \sum_j (A_{i,j,t} \times ef_{i,j,k,t}) = \sum_j (A_{i,j,t} \times c_{i,p,t}(x) \times R_{i,j}(y) \times (1 - \eta_{i,j}(y,z)) \times \theta_{i,j,k}(x,y,z))$$

26 Equation S2: Emissions calculation for Tier 2

$$27 \quad E_{i,k,t} = \sum_p (A_{i,p,t} \times ef_{i,p,k,t}) = \sum_p (A_{i,p,t} \times c_{i,p,t}(x) \times R_{i,j}(y) \times (1 - \eta_{i,p}(y,z)) \times \theta_{i,p,k}(x,y,z))$$

28 Where  $E$  is the emission, kg.  $i$  is the sector.  $j$  is the enterprise.  $k$  is mercury species.  $t$  is year.  $p$  is the province.  $A$  is the activity level.  $ef$  is  
 29 the emission factor.  $x$  is the type of fuel or raw materials.  $y$  is the type of combustion or production process.  $z$  is the type of APCD.  $c$  is Hg  
 30 concentration of fuel or raw materials, g/t.  $R$  is the release rate of combustion or production process, %.  $\eta$  is the probabilistic distribution of  
 31 Hg removal efficiency of a certain type of APCD combination, %.  $\theta$  is the proportion of mercury species, %.

32 Equation S3: Emissions calculation for Tier 3

$$33 \quad E_{i,k,t} = \sum_p (A_{i,p,t} \times ef_{i,p,k,t}) = \sum_p (A_{i,p,t} \times \theta_{i,p,k} \times [(ef_{a_i} - ef_{b_i}) \times \exp\left(-\frac{(t - t_0)^2}{2 \times S_i^2}\right) + ef_{b_i}])$$

34 Where  $ef_a$  is the emission factor pre-1990, g/t.  $ef_b$  is the best emission factor that could be achieved, g/t.  $t_0$  is the time when the technology  
 35 transition begins (pre-1990), yr.  $S$  is the shape parameter of the curve. The largest emission factor for one sector from the literature was set  
 36 as  $ef_a$  while the most recent localized emission factor was used as  $ef_b$ .

37 Equation S4: Spatial distribution of Tier2 and Tier3

$$38 \quad E_{i,j} = [E_{pro}]_i \times \frac{GDP_k}{\sum_{pro} GDP_k} \times \frac{POP/Road_j}{\sum_{city} POP/Road_j}$$

39 Where  $E$  is emission of the grid,  $i$  is the sectors,  $E_{pro}$  is the emissions of the province where the grid is located,  $GDP$  is the gross domestic  
 40 product,  $k$  is the city which belongs to the province,  $POP$  is the population,  $Road$  is the area of the driveway in every grid,  $j$  is the grid which  
 41 belongs to the city.

42

43 **Text S2 Equations for bias calculation**

44 Calculation method of normalized mean bias (NMB)

45 
$$\text{NMB} = \frac{\sum_i (\text{Simulation}_i - \text{Observation}_i)}{\sum_i \text{Observation}_i} \quad (\text{Equation S5})$$

46 Calculation method of normalized mean error (NME)

47 
$$\text{NME} = \frac{\sum_i |\text{Simulation}_i - \text{Observation}_i|}{\sum_i \text{Observation}_i} \quad (\text{Equation S6})$$

48

49 **Table S1 Categories, calculation and spatial distribution of Hg emission sectors**

| Tier | Abbreviation | Sector                                | Calculation method                        | Spatial distribution method |
|------|--------------|---------------------------------------|-------------------------------------------|-----------------------------|
| 1    | CFPP         | Coal-fired power plant                | Technology-based emission factors         | Latitude and longitude      |
| 1    | Zn           | Zinc smelting                         |                                           |                             |
| 1    | Pb           | Lead smelting                         |                                           |                             |
| 1    | Cu           | Copper smelting                       |                                           |                             |
| 1    | CEM          | Cement production                     |                                           |                             |
| 1    | ISP          | Iron and steel production             |                                           |                             |
| 1    | CFIB         | Coal-fired industrial boiler          |                                           |                             |
| 1    | MSWI         | Municipal solid waste incineration    |                                           |                             |
| 1    | LSGP         | Large-scale gold production           |                                           |                             |
| 2    | RBL          | Residential coal combustion           | Dynamic technology-based emission factors | Population                  |
| 2    | OCC          | Other coal combustion                 |                                           | GDP2 and Population         |
| 2    | CSP          | Caustic soda production               |                                           |                             |
| 2    | PVC          | Chlor-alkali production               |                                           |                             |
| 2    | BAP          | Battery production                    |                                           |                             |
| 2    | FLU          | Fluorescent lamp production           |                                           |                             |
| 2    | THP          | Thermometer production                |                                           |                             |
| 2    | SMP          | Sphygmomanometer production           |                                           |                             |
| 3    | BIO          | Biomass fuel combustion               | Time-varying emission factors             | GDP1 and Population         |
| 3    | Hg           | Mercury production                    |                                           | GDP2 and Population         |
| 3    | Al           | Aluminum production                   |                                           |                             |
| 3    | ASGM         | Artisanal and small-scale gold mining |                                           |                             |
| 3    | SOC          | Stationary oil combustion             |                                           | GDP3 and Road map           |
| 3    | MOC          | Mobile oil combustion                 |                                           | Population                  |
| 3    | CRE          | Cremation                             |                                           |                             |

50 Notes: GDP1 represents GDP of primary industry, GDP2 represents GDP of the secondary industry, GDP3 represents GDP  
51 of the tertiary industry.

52

**Table S2 Activity level and references**

| Category                              | Type of activity level                 | References                                                                                                                                                                        |
|---------------------------------------|----------------------------------------|-----------------------------------------------------------------------------------------------------------------------------------------------------------------------------------|
| Coal-fired power plant                | Coal consumption in power plants       | China energy statistical yearbooks (NESA, 1986-2022);<br>Chinese statistics of electric power industry (CEPYEC, 1993-2021);<br>Chinese environmental statistics (CEMS, 2013-2017) |
| Coal-fired industrial boilers         | Coal consumption in industrial boilers | China energy statistical yearbooks (NESA, 1986-2022);<br>Chinese environmental statistics (CEMS, 2013-2017)                                                                       |
| Residential coal combustion           | Coal consumption in residents          | China energy statistical yearbooks (NESA, 1986-2022);<br>Chinese environmental statistics (CEMS, 2013-2017)                                                                       |
| Other coal combustion                 | Coal consumption in others             | China energy statistical yearbooks (NESA, 1986-2022);<br>Chinese environmental statistics (CEMS, 2013-2017)                                                                       |
| Stationary oil combustion             | Oil consumption in stations            | China statistical yearbooks (NBS, 1981-2022)                                                                                                                                      |
| Mobile oil combustion                 | Oil consumption in mobile vehicles     | China statistical yearbooks (NBS, 1981-2022)                                                                                                                                      |
| Biomass fuel combustion               | Biomass consumption                    | China rural energy statistical yearbook (MA, 1997-2021)                                                                                                                           |
| Municipal solid waste incineration    | Waste incineration amount              | China energy statistical yearbook (NESA, 1986-2022)                                                                                                                               |
| Cremation                             | Corpse numbers                         | China civil affairs statistical yearbook (MCA, 1980-2017)                                                                                                                         |
| Copper smelting                       | Copper yield                           | Yearbooks of nonferrous metals industry of China (CMRA, 1991-2020);<br>Chinese environmental statistics (CEMS, 2013-2017)                                                         |
| Leading smelting                      | Leading yield                          | Yearbooks of nonferrous metals industry of China (CMRA, 1991-2020);<br>Chinese environmental statistics (CEMS, 2013-2017)                                                         |
| Zinc smelting                         | Zinc yield                             | Yearbooks of nonferrous metals industry of China (CMRA, 1991-2020);<br>Chinese environmental statistics (CEMS, 2013-2017)                                                         |
| Large-scale gold production           | Gold yield                             | Chinese environmental statistics (CEMS, 2013-2017)                                                                                                                                |
| Artisanal and small-scale gold mining | Gold yield                             | (Wu et al., 2016)                                                                                                                                                                 |
| Aluminum smelting                     | Aluminum yield                         | Chinese environmental statistics (CEMS, 2013-2017)                                                                                                                                |
| Mercury production                    | Mercury yield                          | Yearbooks of nonferrous metals industry of China (CMRA, 1991-2020);<br>Chinese environmental statistics (CEMS, 2013-2017)                                                         |
| Cement production                     | Cement yield                           | Chinese environmental statistics (CEMS, 2013-2017)                                                                                                                                |
| Iron and steel production             | Pig steel yield                        | China steel yearbooks (CISI, 1985-2022);<br>Chinese environmental statistics (CEMS, 2013-2017)                                                                                    |
| Chlor-alkali production               | Vinyl chloride yield                   | China statistical yearbooks (NBS, 1981-2022)<br>Chinese environmental statistics (CEMS, 2013-2017)<br>Report for national mercury investigation of China (MEE, 2012)              |
| Caustic soda production               | Caustic soda yield                     |                                                                                                                                                                                   |
| Battery production                    | Battery yield                          |                                                                                                                                                                                   |
| Fluorescent lamp production           | Fluorescent lamp yield                 |                                                                                                                                                                                   |
| Thermometer production                | Thermometer yield                      |                                                                                                                                                                                   |
| Sphygmomanometer production           | Sphygmomanometer yield                 |                                                                                                                                                                                   |

54 Table S3 Hg removal efficiencies and speciation profiles for APCDs combination

| Sectors                      | APCDs                    | Hg removal efficiency (%) | Probabilistic distribution | Speciation profile (%) |                  |                 | Ref.                                                    |
|------------------------------|--------------------------|---------------------------|----------------------------|------------------------|------------------|-----------------|---------------------------------------------------------|
|                              |                          |                           |                            | Hg <sup>0</sup>        | Hg <sup>2+</sup> | Hg <sup>P</sup> |                                                         |
| Coal-fired power plant       | NOC/CYC                  | 1.0±0.5                   | Weibull                    | 38.0                   | 38.0             | 24.0            | (Liu et al., 2019; Zhang et al., 2023; Wu et al., 2016) |
|                              | WET                      | 23±8                      | Normal                     | 65.0                   | 33.0             | 1.0             |                                                         |
|                              | ESP                      | 32±23                     | Weibull                    | 58.0                   | 41.0             | 1.3             |                                                         |
|                              | FF                       | 67±30                     | Normal                     | 50.0                   | 49.0             | 0.5             |                                                         |
|                              | ESP+WFGD                 | 60±22                     | Weibull                    | 84.0                   | 16.0             | 0.6             |                                                         |
|                              | FF+WFGD                  | 86±10                     | Normal                     | 78.0                   | 21.0             | 1.0             |                                                         |
|                              | ESP-FF+WFGD              | 88±16                     | Normal                     | 84.0                   | 16.0             | 0.6             |                                                         |
|                              | SCR+ESP+WFGD             | 70±21                     | Normal                     | 72.0                   | 27.0             | 1.0             |                                                         |
|                              | SCR+FF+WFGD              | 88±7                      | Normal                     | 37.0                   | 61.0             | 2.0             |                                                         |
|                              | SCR+ESP+WFGD+WESP        | 94±3                      | Normal                     | 69.0                   | 30.0             | 1.0             |                                                         |
|                              | SCR+ESP-FF/LTESP+WFGD    | 97±3                      | Normal                     | 64.0                   | 35.0             | 2.0             |                                                         |
|                              | SNCR+ESP+WFGD            | 98                        | Normal                     | 51.0                   | 48.0             | 1.0             |                                                         |
|                              | (CFB)ESP                 | 73±8                      | Weibull                    | 71.8                   | 27.6             | 0.6             |                                                         |
|                              | (CFB)FF                  | 76±12                     | Normal                     | 81.5                   | 18.0             | 0.5             |                                                         |
| (CFB)SNCR+ESP+WFGD           | 98                       | Normal                    | 51.0                       | 48.0                   | 1.0              |                 |                                                         |
| Coal-fired industrial boiler | NOC/CYC                  | 1.0±0.5                   | Weibull                    | 38.0                   | 38.0             | 24.0            |                                                         |
|                              | WET                      | 23±8                      | Normal                     | 65.0                   | 33.0             | 1.0             |                                                         |
|                              | IDRD                     | 38±21                     | Normal                     | 49.0                   | 48.0             | 3.0             |                                                         |
|                              | FF+WFGD                  | 86±1                      | Normal                     | 78.0                   | 21.0             | 1.0             |                                                         |
|                              | ESP-FF+WFGD              | 88±16                     | Normal                     | 84.0                   | 16.0             | 0.6             |                                                         |
|                              | SCR+FF+WFGD              | 88±7                      | Normal                     | 37.0                   | 61.0             | 2.0             |                                                         |
|                              | ESP                      | 32±23                     | Normal                     | 57.7                   | 41.0             | 1.3             |                                                         |
|                              | FF                       | 67±20                     | Normal                     | 50.5                   | 48.5             | 1.0             |                                                         |
| Pb/Zn/Cu smelting            | None                     | 0                         | Normal                     | 34.0                   | 56.0             | 10.0            |                                                         |
|                              | DC                       | 10±8                      | Normal                     | 33.0                   | 62.0             | 5.0             |                                                         |
|                              | FGS                      | 24±25                     | Normal                     | 65.0                   | 33.0             | 2.0             |                                                         |
|                              | DC+FGS                   | 41±20                     | Normal                     | 41.0                   | 54.0             | 5.0             |                                                         |
|                              | DC+FGS+ESD+SCSA          | 87±3                      | Normal                     | 57.0                   | 38.0             | 5.0             |                                                         |
|                              | DC+FGS+ESD+DCDA          | 97±2                      | Normal                     | 46.0                   | 49.0             | 5.0             |                                                         |
|                              | DC+FGS+ESD+DCDA+DFGD     | 99.0±0.1                  | Normal                     | 94.0                   | 6.0              | 0.0             |                                                         |
|                              | DC+FGS+ESD+DCDA+WFGD     | 99                        | Normal                     | 65.0                   | 35.0             | 0.0             |                                                         |
|                              | DC+FGS+ESD+SMR+DCDA      | 99.0±0.1                  | Normal                     | 6.0                    | 90.0             | 4.0             |                                                         |
|                              | DC+FGS+ESD+SMR+DCDA+DFGD | 99                        | /                          | 65.0                   | 35.0             | 0.0             |                                                         |
|                              | DC+FGS+ESD+SMR+DCDA+WFGD | 99                        | /                          | 56.0                   | 34.0             | 10.0            |                                                         |
| (SK/RK)CYC                   | 1.0±0.5                  | Normal                    | 38.0                       | 38.0                   | 24.0             |                 |                                                         |

|                           |                  |         |        |      |      |      |
|---------------------------|------------------|---------|--------|------|------|------|
| Cement production         | (SK/RK)WET       | 25±1    | Normal | 33.0 | 65.0 | 2.0  |
|                           | (SK/RK)ESP       | 44±29   | Normal | 41.0 | 58.0 | 1.0  |
|                           | (SK/RK)FF        | 62±28   | Normal | 49.0 | 50.0 | 1.0  |
|                           | (DPPT)CYC        | 1.0±0.5 | Normal | 38.0 | 38.0 | 24.0 |
|                           | (DPPT)WET        | 25±1    | Normal | 33.0 | 65.0 | 2.0  |
|                           | (DPPT)ESP        | 6±7     | Normal | 23.5 | 76.0 | 0.5  |
|                           | (DPPT)FF         | 6±7     | Normal | 23.5 | 76.0 | 0.5  |
|                           | SNCR+ESP/FF      | 15      | Normal | 48.0 | 51.0 | 1.0  |
|                           | SNCR+ESP/FF+DFGD | 15      | /      | 48.0 | 51.0 | 1.0  |
|                           | SNCR+ESP/FF+WFGD | 42      | /      | 79.5 | 20.1 | 0.3  |
|                           | SCR+ESP/FF       | 20      | /      | 11.8 | 87.8 | 0.4  |
|                           | SCR+ESP/FF+WFGD  | 69      | /      | 36.0 | 63.8 | 0.3  |
| Iron and steel production | Non/CYC          | 1       | Normal | 38.0 | 38.0 | 24.0 |
|                           | WS               | 23      | Normal | 65.0 | 34.0 | 1.0  |
|                           | ESP              | 29      | Normal | 18.0 | 82.0 | 0.0  |
|                           | FF               | 67      | Normal | 18.0 | 82.0 | 0.0  |
|                           | ESP+WFGD         | 57      | Normal | 41.0 | 59.0 | 0.0  |
|                           | ESP+DFGD+FF      | 72      | /      | 0.5  | 99.0 | 0.5  |
|                           | SCR+ESP+WFGD     | 70      | /      | 56.7 | 43.1 | 0.2  |
|                           | SCR+ESP+DFGD+FF  | 81      | /      | 37.0 | 61.0 | 2.0  |
|                           | SCR+FF+WFGD      | 88      | /      | 37.0 | 61.0 | 2.0  |

55 Note, CYC: cyclone, WET: wet scrubber, ESP: electrostatic precipitator, FF: fabric filter, WFGD: wet flue gas  
56 desulfurization, SCR: selective catalytic reduction, WESP: wet electrostatic precipitator, LTESP: low temperature electrostatic  
57 precipitator, SNCR: selective non-catalytic reduction, CFB: circulating fluidized bed, IDR: In-duct reaction device, DC: dust  
58 collector, FGS: flue gas scrubber, ESD: electrostatic demister, SCSA: single conversion single absorption, DCDA: double  
59 conversion double absorption, DFGD: dry flue gas desulfurization, SMR: selective multi-component reduction, SK/RK: shaft  
60 kiln or rotary kiln, DPPT: dry-process precalciner technology, WS: wet scrubbing.

61

62 **Table S4 GEM observations and validation of simulation at 2021 (\*GEM\_obs: GEM observations, ng/m<sup>3</sup>; GEM\_std:**  
63 **standard error of GEM observations; GEM\_sim\_proxy: GEM simulation based on proxy; GEM\_sim\_P-CAME: GEM**  
64 **simulation based on P-CAME; NMB: normalized mean bias; NME: normalized mean error)**

| Lon     | Lat    | Provinces      | Sites        | Type  | Month | GEM_obs | GEM_std | References          | GEM_sim_proxy | GEM_sim_P-CAME | NMB/NME        |      |      |      |                |
|---------|--------|----------------|--------------|-------|-------|---------|---------|---------------------|---------------|----------------|----------------|------|------|------|----------------|
| 118.77  | 32.08  | Jiangsu        | Nanjing      | urban | 1     | 1.94    | /       | (Sun et al., 2024)  | 3.31          | 2.91           | NMB_Proxy=59%  |      |      |      |                |
|         |        |                |              |       | 2     | 0.98    |         |                     | 2.85          | 2.52           |                |      |      |      |                |
|         |        |                |              |       | 3     | 1.31    |         |                     | 2.74          | 2.41           |                |      |      |      |                |
|         |        |                |              |       | 4     | 1.46    |         |                     | 2.49          | 2.18           | NME_Proxy=59%  |      |      |      |                |
|         |        |                |              |       | 5     | 1.48    |         |                     | 2.36          | 2.06           |                |      |      |      |                |
|         |        |                |              |       | 6     | 2.08    |         |                     | 2.30          | 1.93           | NMB_P-CAME=39% |      |      |      |                |
|         |        |                |              |       | 7     | 1.46    |         |                     | 1.44          | 1.34           |                |      |      |      |                |
|         |        |                |              |       | 8     | 1.90    |         |                     | 2.00          | 1.78           |                |      |      |      |                |
|         |        |                |              |       | 9     | 1.37    |         |                     | 2.19          | 1.91           |                |      |      |      |                |
|         |        |                |              |       |       |         |         |                     |               |                | 10             | 1.15 | 2.35 | 1.97 | NME_P-CAME=44% |
| 111.76  | 40.83  | Inner Mongolia | Hohhot       | urban | 1     | 1.32    | 0.69    | This study          | 2.69          | 2.09           | NMB_Proxy=57%  |      |      |      |                |
|         |        |                |              |       | 2     | 1.42    | 0.52    |                     | 2.59          | 2.03           |                |      |      |      |                |
|         |        |                |              |       | 3     | 1.69    | 0.78    |                     | 2.62          | 2.07           |                |      |      |      |                |
|         |        |                |              |       | 4     | 1.52    | 0.60    |                     | 2.36          | 1.88           | NME_Proxy=57%  |      |      |      |                |
|         |        |                |              |       | 5     | 1.45    | 0.68    |                     | 1.70          | 1.45           |                |      |      |      |                |
|         |        |                |              |       | 6     | 1.41    | 0.61    |                     | 1.80          | 1.48           | NMB_P-CAME=24% |      |      |      |                |
|         |        |                |              |       | 7     | 1.38    | 0.34    |                     | 1.70          | 1.43           |                |      |      |      |                |
|         |        |                |              |       | 8     | 1.37    | 0.35    |                     | 1.92          | 1.53           |                |      |      |      |                |
|         |        |                |              |       | 9     | 1.13    | 0.27    |                     | 2.09          | 1.65           |                |      |      |      |                |
|         |        |                |              |       |       |         |         |                     |               | 10             | 1.27           | 0.78 | 2.32 | 1.73 | NME_P-CAME=24% |
|         |        |                |              |       |       |         |         |                     |               | 11             | 1.66           | 1.25 | 2.32 | 1.78 |                |
|         |        |                |              |       |       |         |         |                     |               | 12             | 1.36           | 0.81 | 2.54 | 1.88 |                |
| 120.507 | 36.163 | Shandong       | Qingdao      | urban | 1     | 3.0     | /       | (Shao et al., 2022) | 3.45          | 2.56           | NMB_Proxy=23%  |      |      |      |                |
|         |        |                |              |       | 2     | 2.0     |         |                     | 2.71          | 2.09           |                |      |      |      |                |
|         |        |                |              |       |       |         |         |                     |               |                | NME_Proxy=23%  |      |      |      |                |
|         |        |                |              |       |       |         |         |                     |               |                | NMB_P-CAME=-7% |      |      |      |                |
|         |        |                |              |       |       |         |         |                     |               |                | NME_P-CAME=10% |      |      |      |                |
| 128.113 | 42.40  | Jilin          | Mt. Changbai | rural | 1     | 1.59    | /       | (Wu et al., 2023)   | 1.43          | 1.43           | NMB_Proxy=-6%  |      |      |      |                |
|         |        |                |              |       | 2     | 1.64    |         |                     | 1.52          | 1.52           |                |      |      |      |                |
|         |        |                |              |       | 3     | 1.59    |         |                     | 1.50          | 1.49           |                |      |      |      |                |



|          |          |          |           |       |    |         |   |                   |      |      |                                                                    |
|----------|----------|----------|-----------|-------|----|---------|---|-------------------|------|------|--------------------------------------------------------------------|
|          |          |          |           |       | 4  | 1.34    |   |                   | 1.32 | 1.32 | NME_Proxy=7%<br>NMB_P-CAME=-6%<br>NME_P-CAME=7%                    |
|          |          |          |           |       | 5  | 1.23    |   |                   | 1.26 | 1.26 |                                                                    |
|          |          |          |           |       | 6  | 1.12    |   |                   | 1.20 | 1.20 |                                                                    |
|          |          |          |           |       | 7  | 1.22    |   |                   | 1.12 | 1.12 |                                                                    |
|          |          |          |           |       | 8  | 1.13    |   |                   | 1.10 | 1.10 |                                                                    |
|          |          |          |           |       | 9  | 1.16    |   |                   | 1.16 | 1.16 |                                                                    |
|          |          |          |           |       | 10 | 1.35    |   |                   | 1.19 | 1.19 |                                                                    |
|          |          |          |           |       | 11 | 1.52166 |   |                   | 1.25 | 1.25 |                                                                    |
| 101.02   | 24.533   | Yunnan   | Mt. Ailao | rural | 1  | 1.77    | / | (Wu et al., 2023) | 1.96 | 1.89 | NMB_Proxy=-2%<br>NME_Proxy=12%<br>NMB_P-CAME=-4%<br>NME_P-CAME=12% |
|          |          |          |           |       | 2  | 1.42    |   |                   | 1.74 | 1.67 |                                                                    |
|          |          |          |           |       | 3  | 1.56    |   |                   | 1.56 | 1.51 |                                                                    |
|          |          |          |           |       | 4  | 1.62    |   |                   | 1.50 | 1.45 |                                                                    |
|          |          |          |           |       | 5  | 1.45    |   |                   | 1.21 | 1.19 |                                                                    |
|          |          |          |           |       | 6  | 1.38    |   |                   | 1.21 | 1.20 |                                                                    |
|          |          |          |           |       | 7  | 1.20    |   |                   | 1.20 | 1.18 |                                                                    |
|          |          |          |           |       | 8  | 1.23    |   |                   | 1.22 | 1.20 |                                                                    |
|          |          |          |           |       | 9  | 1.48    |   |                   | 1.16 | 1.13 |                                                                    |
|          |          |          |           |       | 10 | 1.72    |   |                   | 1.51 | 1.47 |                                                                    |
|          |          |          |           |       | 11 | 1.15    |   |                   | 1.47 | 1.41 |                                                                    |
| 121.9826 | 31.46799 | Shanghai | Chongming | rural | 2  | 1.35    | / | This study        | 1.82 | 1.80 | NMB_Proxy=-2%<br>NME_Proxy=19%<br>NMB_P-CAME=-1%<br>NME_P-CAME=18% |
|          |          |          |           |       | 3  | 1.45    |   |                   | 1.64 | 1.67 |                                                                    |
|          |          |          |           |       | 4  | 1.49    |   |                   | 1.39 | 1.42 |                                                                    |
|          |          |          |           |       | 5  | 1.71    |   |                   | 1.49 | 1.52 |                                                                    |
|          |          |          |           |       | 6  | 1.58    |   |                   | 1.26 | 1.29 |                                                                    |
|          |          |          |           |       | 7  | 1.82    |   |                   | 1.09 | 1.09 |                                                                    |
|          |          |          |           |       | 10 | 0.87    |   |                   | 1.01 | 1.03 |                                                                    |
|          |          |          |           |       | 11 | 1.34    |   |                   | 1.46 | 1.47 |                                                                    |
|          |          |          |           |       | 12 | 1.48    |   |                   | 1.63 | 1.62 |                                                                    |

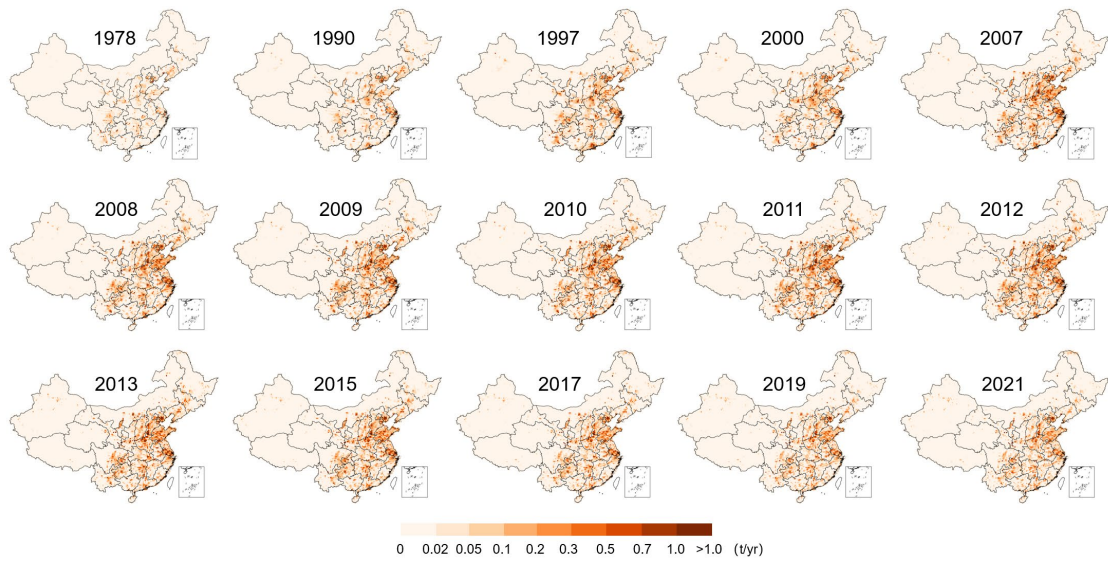

66

67 **Figure S1 Spatial distribution of anthropogenic mercury emissions.**

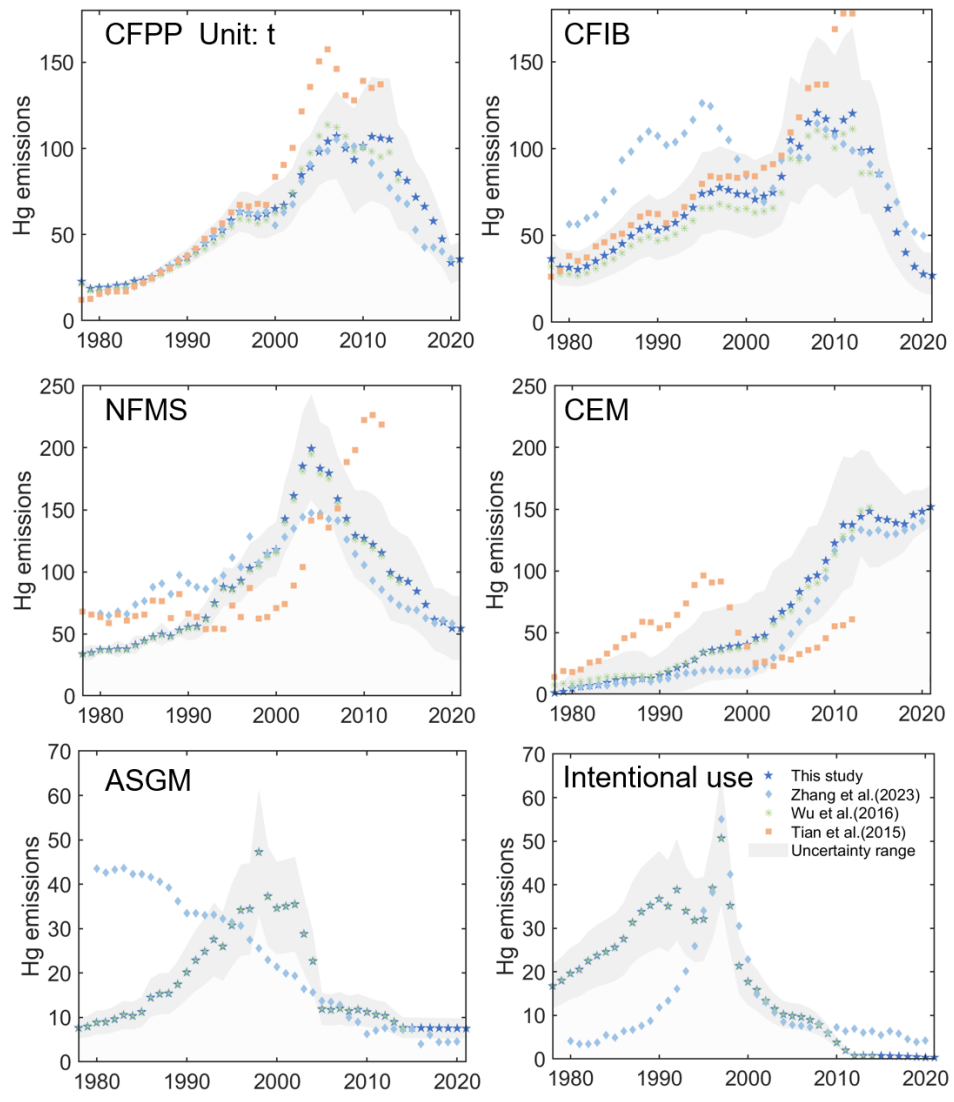

68

69 **Figure S2 Comparison in key sectors with previous emission inventories.**

70

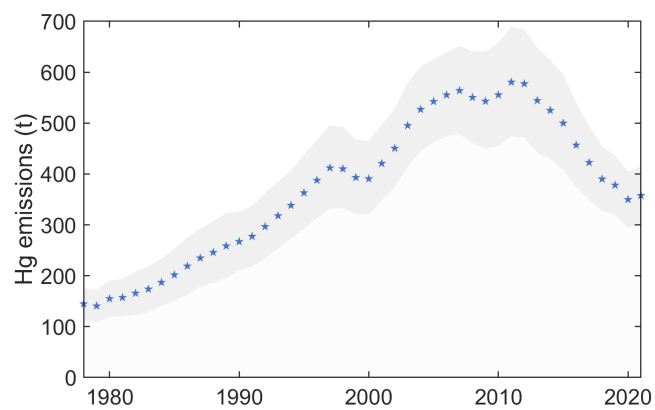

71

72 **Figure S3 Uncertainty range of anthropogenic mercury emissions during 1978-2021.**

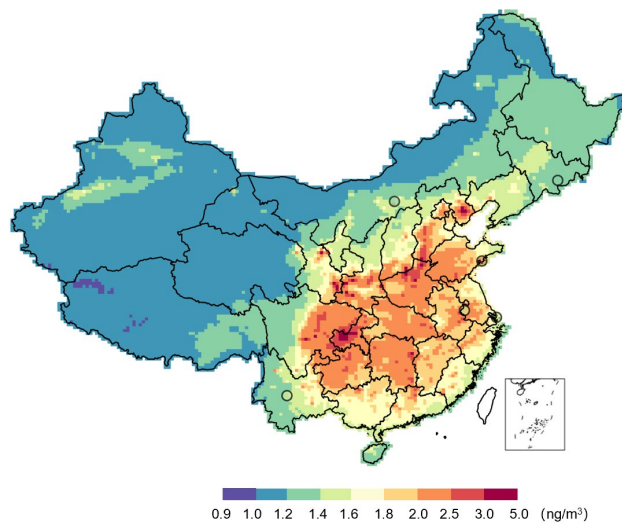

73

74 **Figure S4 GEM concentrations simulated by GEOS-Chem using P-CAME and comparison with**  
 75 **observations (Circles represent observed GEM concentrations).**

76

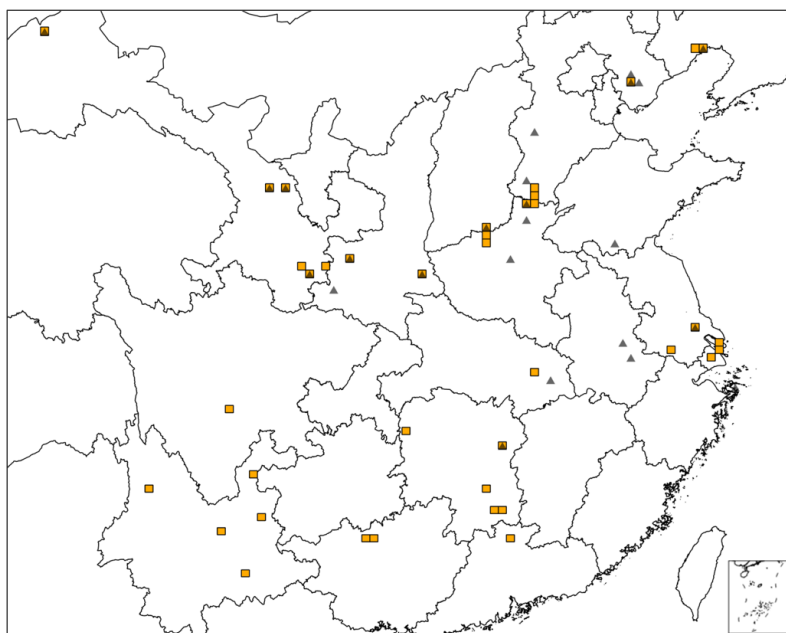

77

78 **Figure S5 Comparison of hotspots between cumulative emissions and emissions at 2021. The**  
79 **triangle represents the 2021 atmospheric mercury emission hotspots, and the square represents the**  
80 **historical cumulative emission hotspots.**

81

82 **References**

- 83 CEMS (China Environmental Monitoring Station): Chinese environmental statistics, China  
84 Environmental Monitoring Station, Beijing, 2013-2017.
- 85 CEPYEC (China Electric Power Yearbook Editorial Committee): Chinese statistics of electric power  
86 industry, China Electric Power Press, Beijing, 1993-2021.
- 87 CISI (Editorial Committee of China Iron and Steel Industry Annual Review, Ministry of Metallurgical  
88 Industry of China): China steel yearbooks, China Metallurgical Press, Beijing, 1985-2022.
- 89 CMRA (China Nonferrous Metals Industry Association): Yearbooks of nonferrous metals industry of  
90 China, China Printing Corporation, Beijing, 1991-2020.
- 91 Liu, K., Wu, Q., Wang, L., Wang, S., Liu, T., Ding, D., Tang, Y., Li, G., Tian, H., Duan, L., Wang, X., Fu,  
92 X., Feng, X., and Hao, J.: Measure-Specific Effectiveness of Air Pollution Control on China's  
93 Atmospheric Mercury Concentration and Deposition during 2013–2017, *Environmental Science &  
94 Technology*, 53, 8938-8946, 10.1021/acs.est.9b02428, 2019.
- 95 MA (Department of Science, Technology and Education, Ministry of Agriculture): China Rural energy  
96 statistical Yearbook, China Agriculture Press, Beijing, 1997-2021.
- 97 MCA (Ministry of Civil Affairs, People's Republic of China): China Civil Affairs Statistical Yearbook,  
98 China Statistics Press, Beijing, 1980-2017.
- 99 MEE (Ministry of Ecology and Environment of the People's Republic of China): Report for National  
100 Mercury Investigation of China, Beijing, 2012.
- 101 NBS (National Bureau of Statistics of the People's Republic of China): China Statistical Yearbooks,  
102 China Statistics Press, Beijing, 1981-2022.
- 103 NESA (National Energy Statistical Agency of China): China Energy Statistical Yearbooks, China  
104 Statistics Press, Beijing, 1986-2022.
- 105 Shao, L., Wang, Y., Liu, X., Liu, R., Han, K., and Zhang, Y.: Temporal variation of gaseous elemental  
106 mercury in a northern coastal city in China: Monsoon and COVID-19 lockdown effects, *Atmospheric  
107 Pollution Research*, 13, 101436, <https://doi.org/10.1016/j.apr.2022.101436>, 2022.
- 108 Sun, P., Song, Z., Qin, Y., Xu, Z., Zhang, Y., Zhong, S., and Yu, J.: Declines of gaseous element mercury  
109 concentrations at an urban site in eastern China caused by reductions of anthropogenic emission,  
110 *Atmospheric Environment*, 317, 10.1016/j.atmosenv.2023.120199, 2024.
- 111 Wu, Q., Wang, S., Li, G., Liang, S., Lin, C.-J., Wang, Y., Cai, S., Liu, K., and Hao, J.: Temporal Trend  
112 and Spatial Distribution of Speciated Atmospheric Mercury Emissions in China During 1978–2014,  
113 *Environmental Science & Technology*, 50, 13428-13435, 10.1021/acs.est.6b04308, 2016.
- 114 Wu, X., Fu, X., Zhang, H., Tang, K., Wang, X., Zhang, H., Deng, Q., Zhang, L., Liu, K., Wu, Q., Wang,  
115 S., and Feng, X.: Changes in Atmospheric Gaseous Elemental Mercury Concentrations and Isotopic  
116 Compositions at Mt. Changbai During 2015–2021 and Mt. Ailao During 2017–2021 in China, *Journal*

117 of Geophysical Research: Atmospheres, 128, e2022JD037749, <https://doi.org/10.1029/2022JD037749>,  
118 2023.

119 Zhang, Y., Zhang, L., Cao, S., Liu, X., Jin, J., and Zhao, Y.: Improved Anthropogenic Mercury Emission  
120 Inventories for China from 1980 to 2020: Toward More Accurate Effectiveness Evaluation for the  
121 Minamata Convention, *Environmental Science & Technology*, 57, 8660-8670, 10.1021/acs.est.3c01065,  
122 2023.

123
